# Supplementary material for: Host–guest interaction between fluoro-substituted azobenzene derivative and cyclodextrins
Source: Royal Society of Chemistry journal article supplement (doi:10.1039/c4ra13283a), 2015-01-01
Supplement: c4ra13283a1.pdf [file c4ra13283a1.pdf]

## Supporting Information

### Table of Contents

|                                                                                                                                                                                                                           |               |
|---------------------------------------------------------------------------------------------------------------------------------------------------------------------------------------------------------------------------|---------------|
| <b>Characterization of F-azo-COOH</b>                                                                                                                                                                                     | <b>P2-P3</b>  |
| <b>NMR spectroscopy of F-azo-COOH solution under irradiation with green and blue light</b>                                                                                                                                | <b>P4</b>     |
| <b>Partial ROESY spectra of a mixture of F-azo-COOH and <math>\alpha</math>-CD after irradiation with green light</b>                                                                                                     | <b>P5</b>     |
| <b>Partial ROESY spectra of a mixture of F-azo-COOH and <math>\beta</math>-CD after irradiation with green light</b>                                                                                                      | <b>P6</b>     |
| <b><math>^1\text{H}</math> NMR spectra in <math>\alpha</math>-CD part of F-azo-COOH in the presence of various concentrations of <math>\alpha</math>-CD</b>                                                               | <b>P7</b>     |
| <b><math>^1\text{H}</math> NMR spectra in <math>\alpha</math>-CD part of F-azo-COOH in the presence of various concentrations of <math>\alpha</math>-CD after irradiation with green light</b>                            | <b>P8</b>     |
| <b><math>^1\text{H}</math> NMR spectra in <math>\beta</math>-CD part of F-azo-COOH in the presence of various concentrations of <math>\beta</math>-CD</b>                                                                 | <b>P9</b>     |
| <b><math>^1\text{H}</math> NMR spectra in <math>\beta</math>-CD part of F-azo-COOH in the presence of various concentrations of <math>\beta</math>-CD after irradiation with green light</b>                              | <b>P10</b>    |
| <b><math>^1\text{H}</math> NMR spectra of 1.0 mM F-azo-COOH in the presence of various concentrations of <math>\beta</math>- and <math>\alpha</math>-CD after irradiation with green light and Benesi-Hildebrand plot</b> | <b>P11</b>    |
| <b>Benesi-Hildebrand plot<sup>2</sup> of all complexes</b>                                                                                                                                                                | <b>P12-13</b> |
| <b>ICD and UV-vis spectra of <math>5 \times 10^{-5}</math> M F-azo-COOH in the presence of 10 mM <math>\alpha</math>-CD before and after irradiation with green light</b>                                                 | <b>P14</b>    |

## 1. Synthesis and characterization of F-azo-COOH<sup>1</sup>

**Materials.** Solvent and starting materials were used as received.  $\alpha$ -CD (Energy, 98%),  $\beta$ -CD (Aladdin, 98%), 2,6-difluoroaniline (Energy, 99%), copper (I) cyanide (Aladdin, 99%) were used as received. All other chemicals were of analytical reagent grade and purchased from Sinopharm. Compounds 1a-3 were synthesized according to previous reports.<sup>1</sup>

### Scheme 1. Synthetic Procedures of F-azo-COOH.

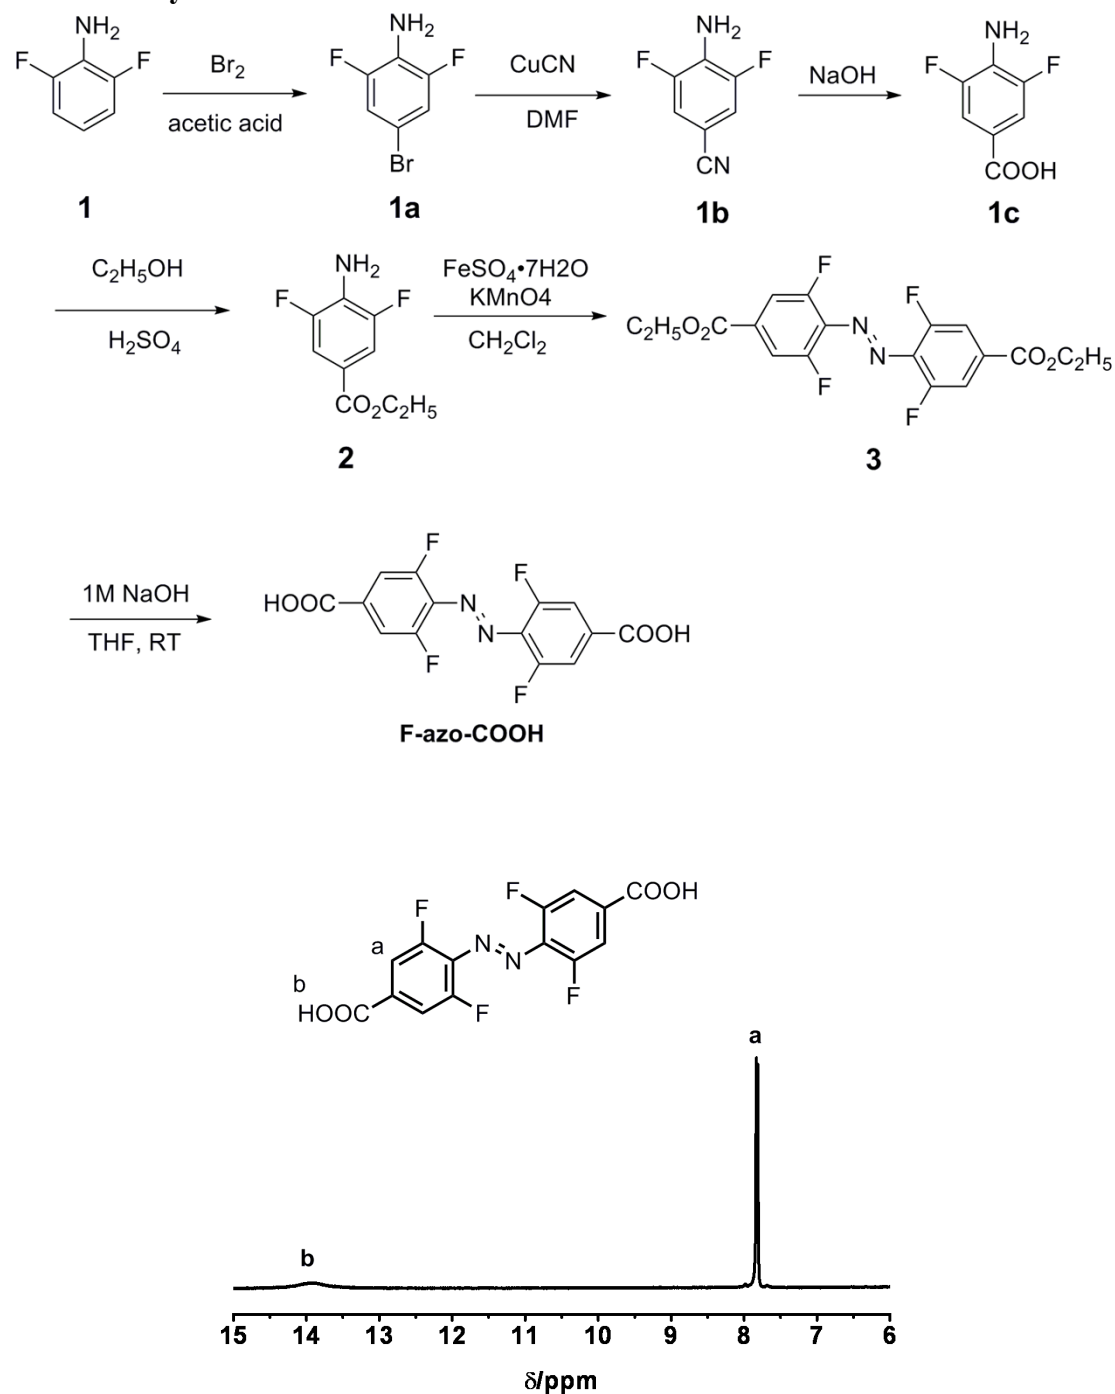

**Figure S1.** <sup>1</sup>H NMR spectrum (500 MHz, 298 K, DMSO-d<sub>6</sub>) of F-azo-COOH in 10 mM Na<sub>2</sub>CO<sub>3</sub> aqueous solution.

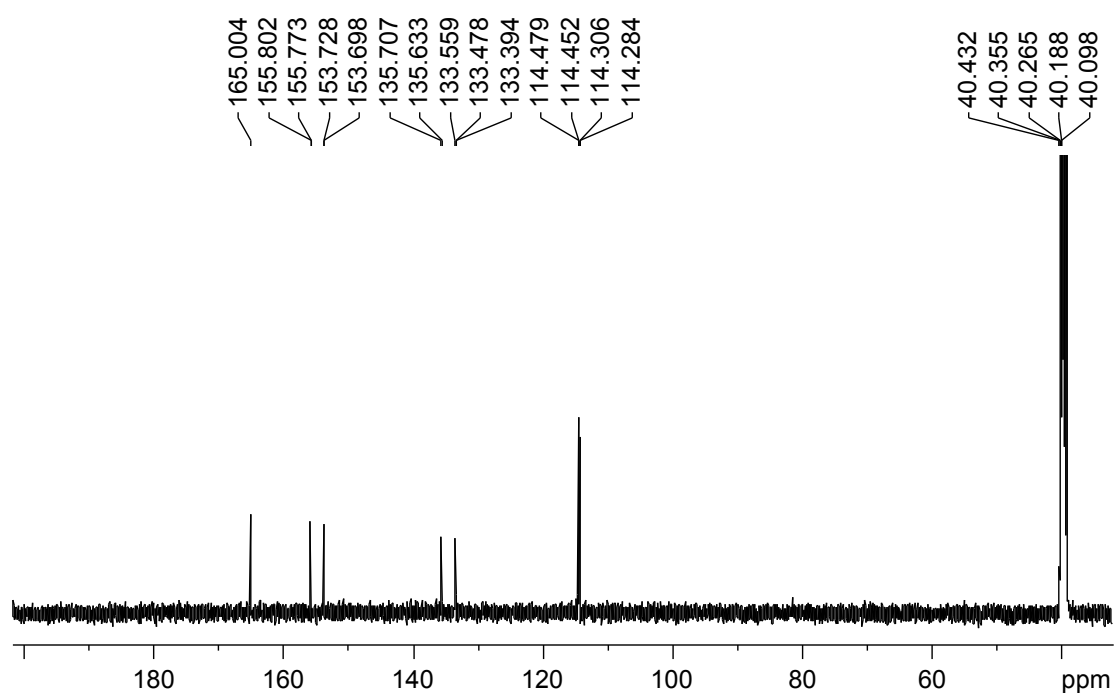

**Figure S2.**  $^{13}\text{C}$  NMR spectrum (500 MHz, 298 K,  $\text{D}_2\text{O}$ ) of F-azo-COOH in 10 mM  $\text{Na}_2\text{CO}_3$  aqueous solution.

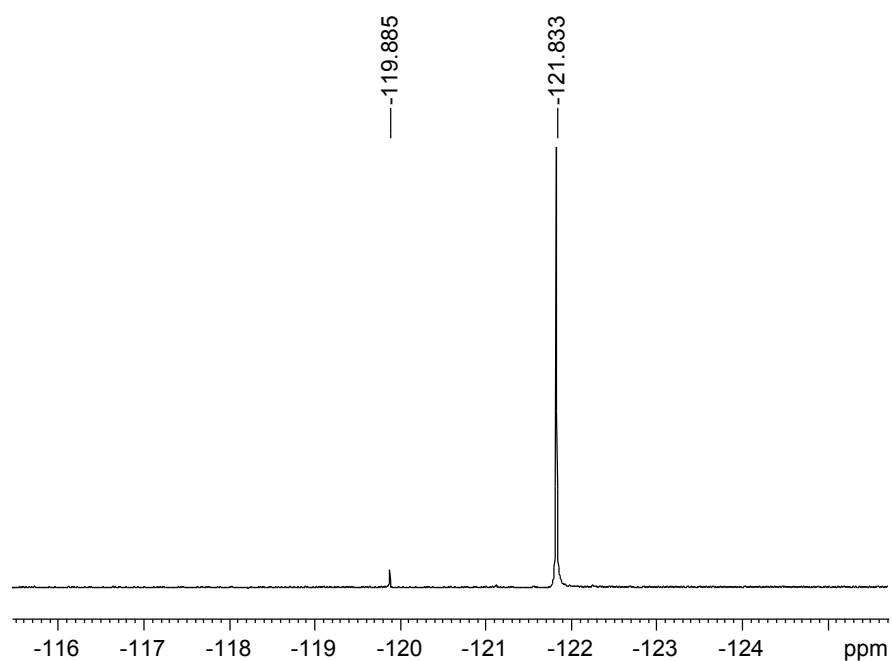

**Figure S3.**  $^{19}\text{F}$  NMR spectrum (400 MHz, 298 K,  $\text{D}_2\text{O}$ ) of F-azo-COOH in 10 mM  $\text{Na}_2\text{CO}_3$  aqueous solution. The  $^{19}\text{F}$  NMR spectrum showed two signals at -121.83 and -119.88 ppm that were assigned to the *trans* and *cis* isomers, respectively.

## 2. NMR spectra of F-azo-COOH under irradiation with green and blue light

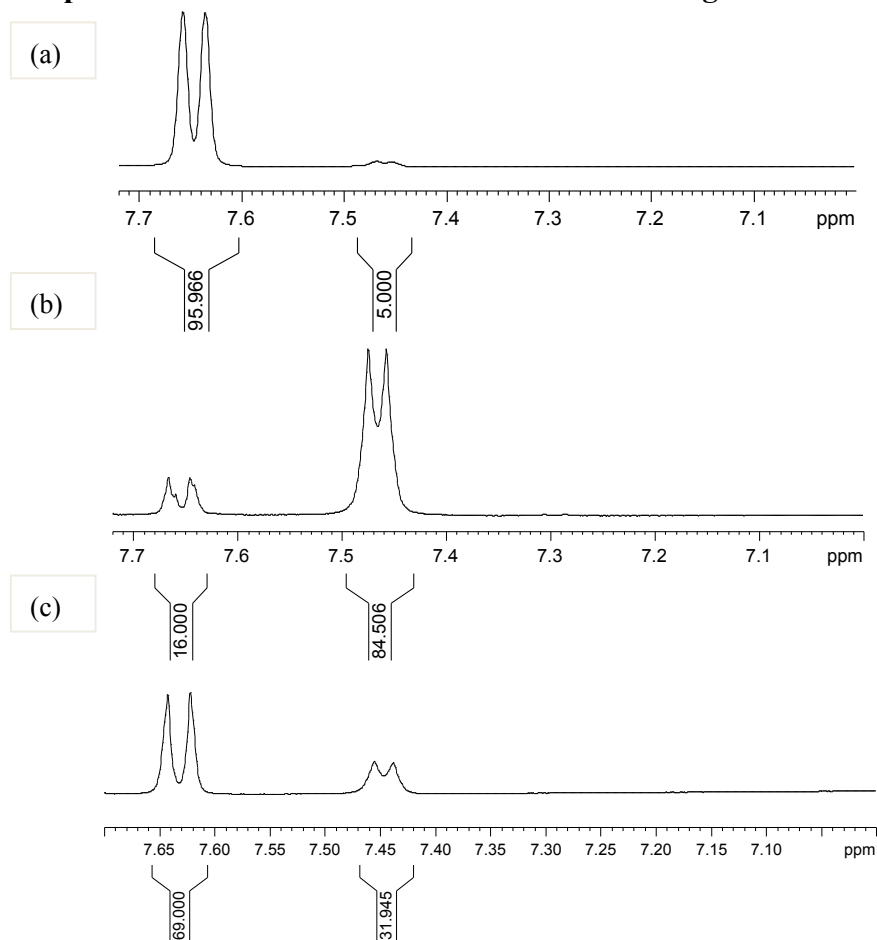

**Figure S4.** <sup>1</sup>H NMR spectra (500 MHz, 298 K, D<sub>2</sub>O) of (a) F-azo-COOH (*trans:cis* = 95:5) in 10 mM Na<sub>2</sub>CO<sub>3</sub> aqueous solution, (b) irradiation with green light for 10 min until the photostationary state (*trans:cis* = 16:84) was reached, (c) then with blue light for 8 min until the photostationary state (*trans:cis* = 69:31) was reached.

**3. Partial ROESY spectrum of the mixture of F-azo-COOH and  $\alpha$ -CD after irradiation with green light**

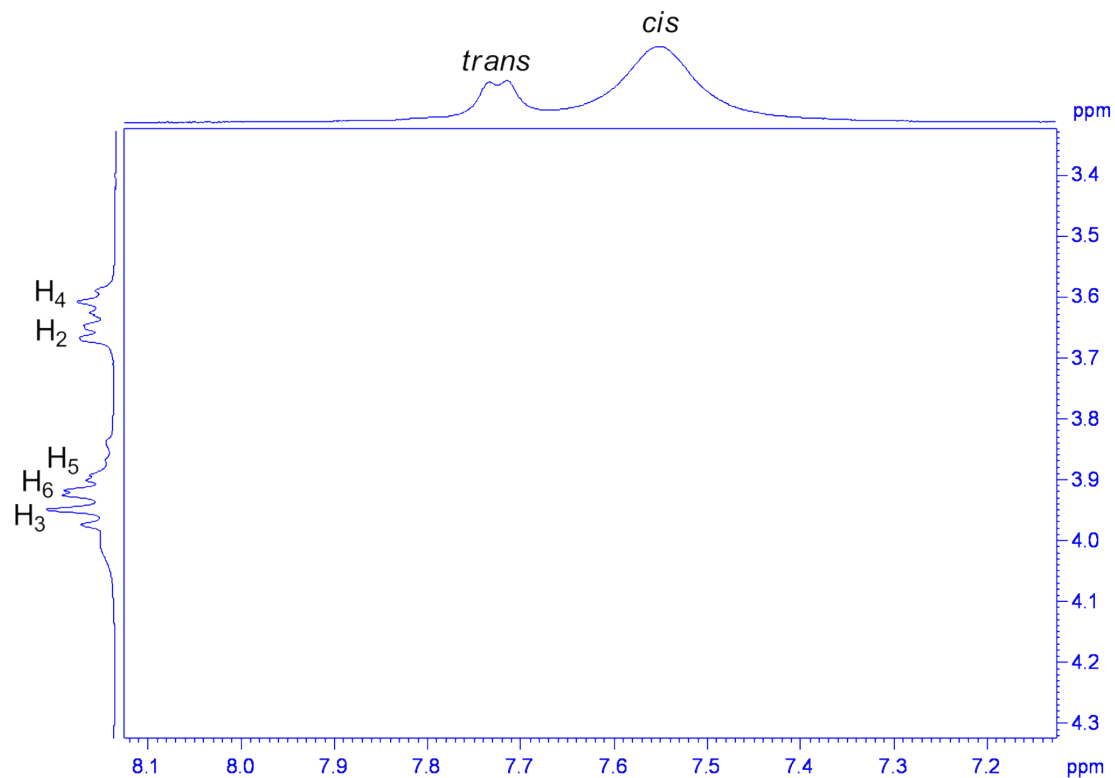

**Figure S5.** Partial ROESY spectrum (500 MHz, 298 K, D<sub>2</sub>O) of the mixture of F-azo-COOH (5 mM) and  $\alpha$ -CD (1:1 molar ratio) in 10 mM Na<sub>2</sub>CO<sub>3</sub> aqueous solution after irradiation with green light for 10 min. The NOE signals were undetectable between *cis*-F-azo-COOH and  $\alpha$ -CD.

**4. Partial ROESY spectrum of the mixture of F-azo-COOH and  $\beta$ -CD after irradiation with green light**

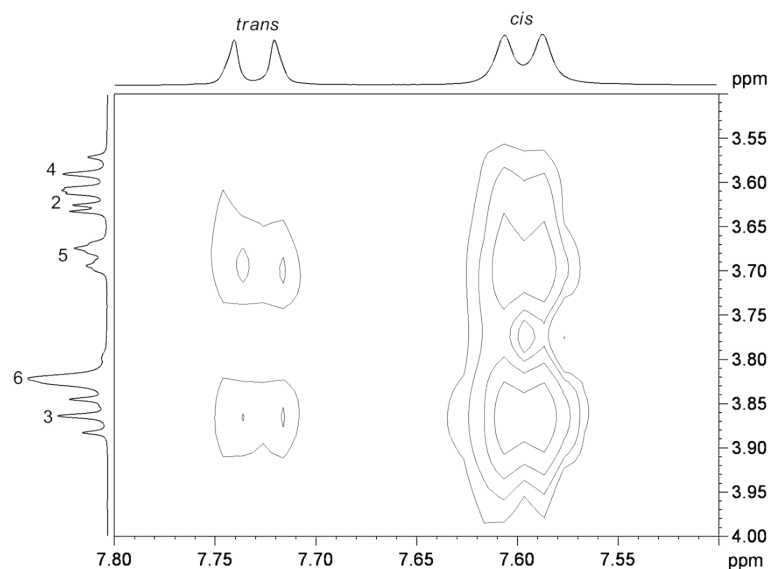

**Figure S6.** Partial 2D ROESY spectra (500 MHz, 298 K, D<sub>2</sub>O, 5 mM) of the mixture of F-azo-COOH and  $\beta$ -CD (1:1 molar ratio) in 10 mM Na<sub>2</sub>CO<sub>3</sub> aqueous solution after irradiation with green light. This spectra was obtained from magnifying the ROE signals in figure 5B.

## 5. $^1\text{H}$ NMR spectra in $\alpha$ -CD part of F-azo-COOH in the presence of various concentrations of $\alpha$ -CD

$\alpha$ -CD/F-azo-COOH  
(mM/mM)

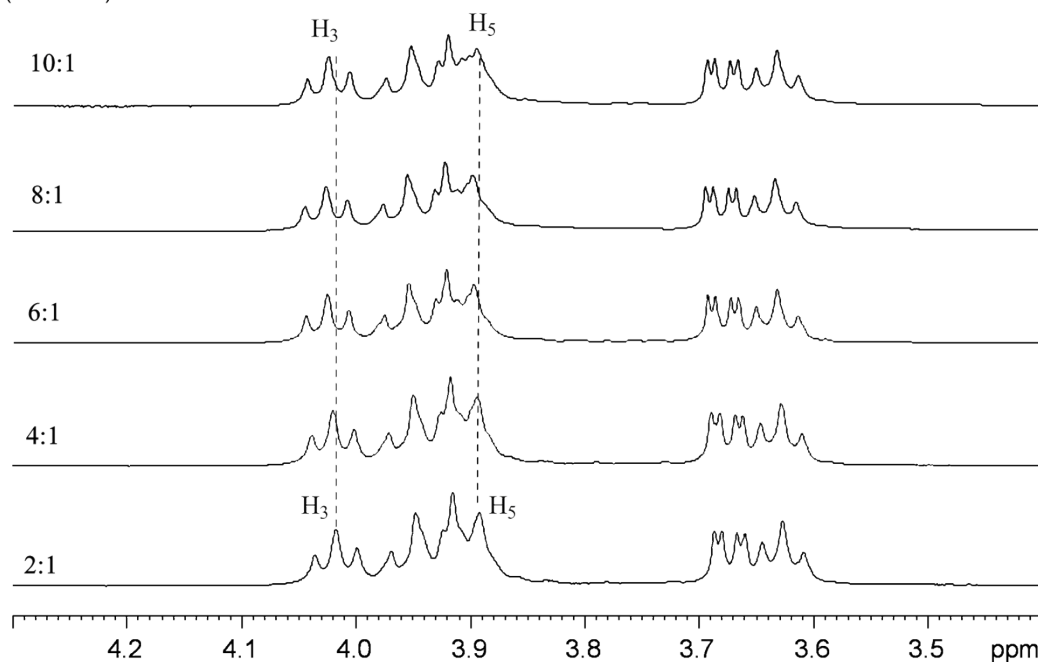

**Figure S7.**  $^1\text{H}$  NMR spectra (500 MHz, 298 K,  $\text{D}_2\text{O}$ ) in  $\alpha$ -CD part of 1.0 mM F-azo-COOH in the presence of various concentrations of  $\alpha$ -CD in 10 mM  $\text{Na}_2\text{CO}_3$  aqueous solution. The H-5 resonance of  $\alpha$ -CD remains unchanged upon increasing the concentration of  $\alpha$ -CD, indicating that *trans*-F-azo-COOH molecule was then believed to be inserted shallowly in the cavity of  $\alpha$ -CD.

**6.  $^1\text{H}$  NMR spectra in  $\alpha$ -CD part of F-azo-COOH in the presence of various concentrations of  $\alpha$ -CD after irradiation with green light**

$\alpha$ -CD/*cis*-F-azo-COOH  
(mM/mM)

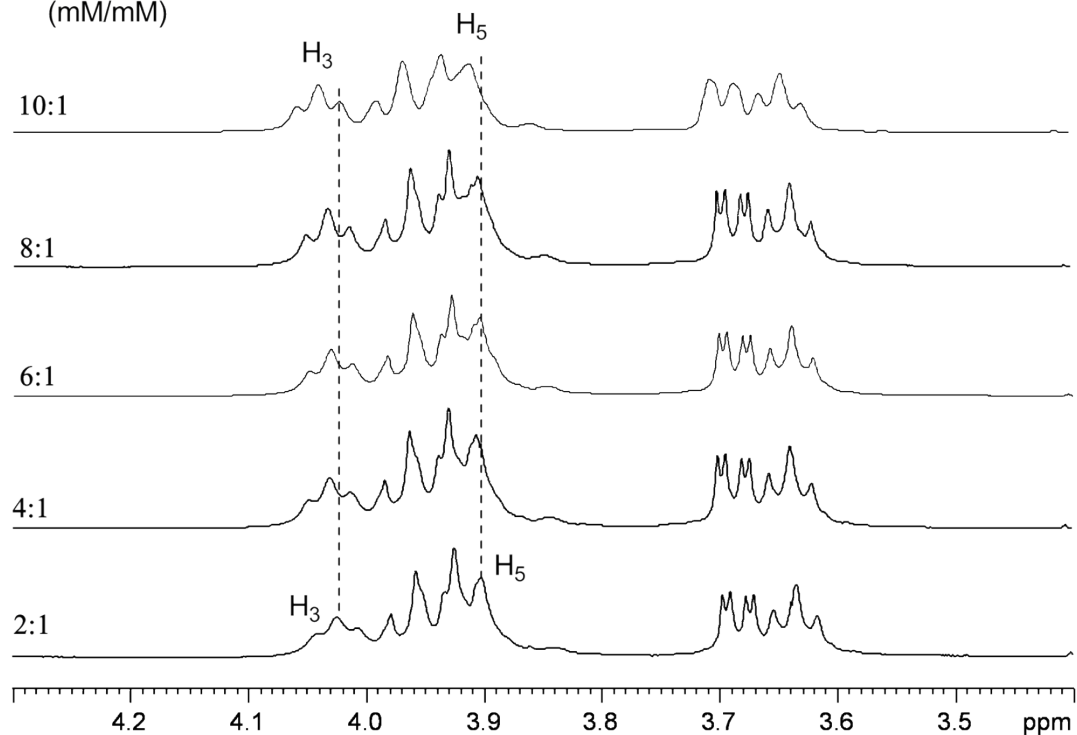

**Figure S8.**  $^1\text{H}$  NMR spectra (500 MHz, 298 K,  $\text{D}_2\text{O}$ ) in  $\alpha$ -CD part of 1.0 mM F-azo-COOH in the presence of various concentrations of  $\alpha$ -CD in 10 mM  $\text{Na}_2\text{CO}_3$  aqueous solution after irradiation with green light.

**7.  $^1\text{H}$  NMR spectra in  $\beta$ -CD part of F-azo-COOH in the presence of various concentrations of  $\beta$ -CD**

$\beta$ -CD/F-azo-COOH  
(mM/mM)

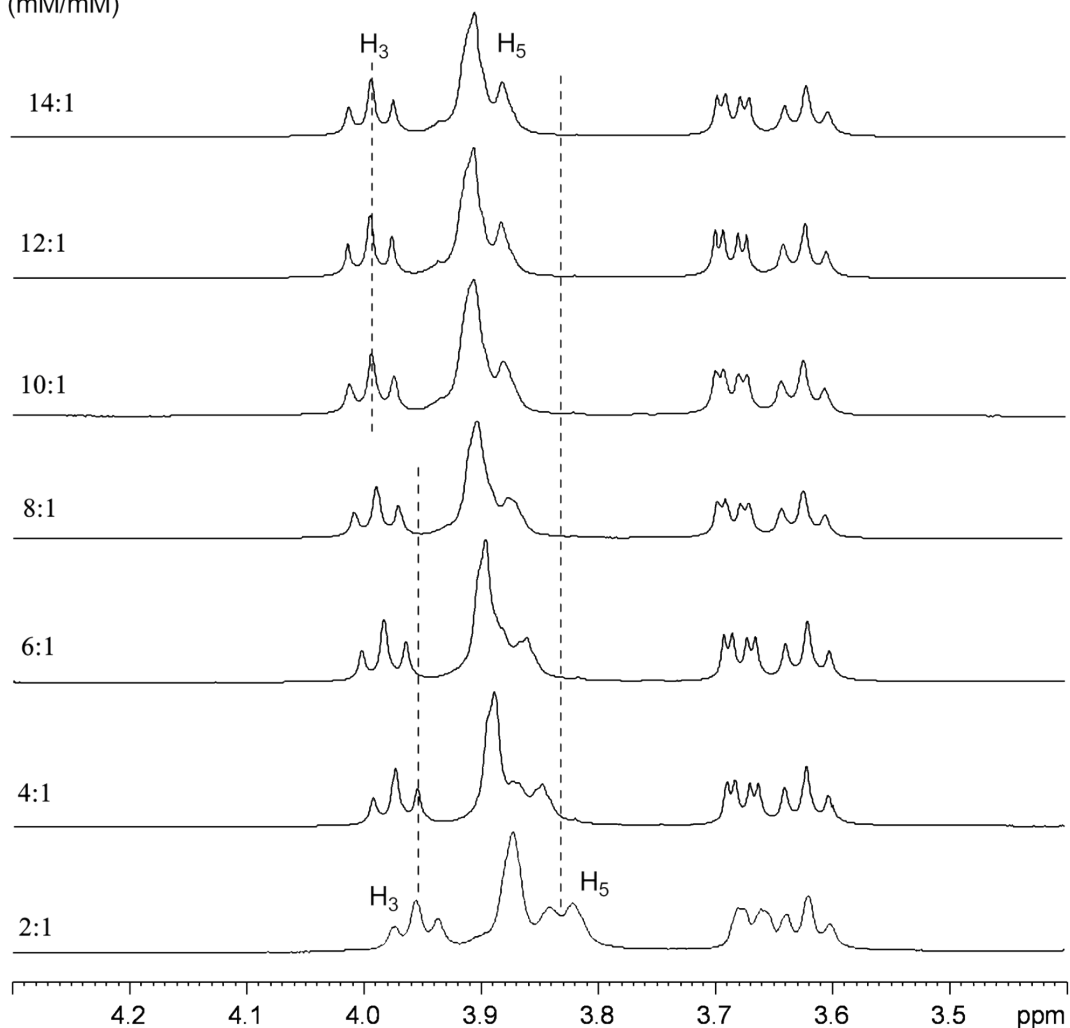

**Figure S9.**  $^1\text{H}$  NMR spectra (500 MHz, 298 K,  $\text{D}_2\text{O}$ ) in  $\beta$ -CD part of 1.0 mM F-azo-COOH in the presence of various concentrations of  $\beta$ -CD in 10 mM  $\text{Na}_2\text{CO}_3$  aqueous solution. The  $^1\text{H}$  NMR signals for the inner C3 protons of  $\beta$ -CD unchanged at the concentration  $>10$  mM.

**8.  $^1\text{H}$  NMR spectra in  $\beta$ -CD part of F-azo-COOH in the presence of various concentrations of  $\beta$ -CD after irradiation with green light**

$\beta$ -CD/*cis*-F-azo-COOH  
(mM/mM)

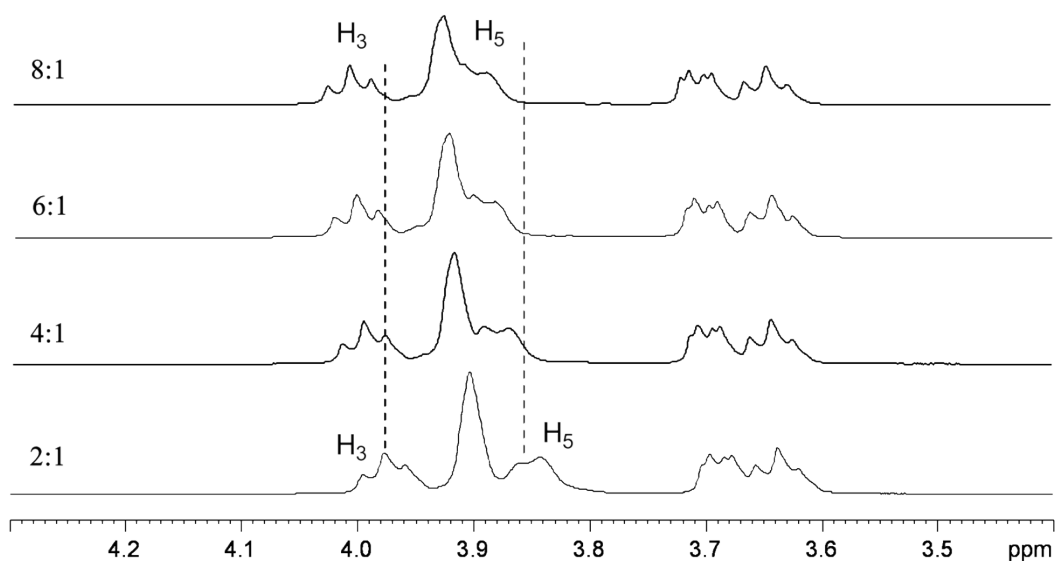

**Figure S10.**  $^1\text{H}$  NMR spectra (500 MHz, 298 K,  $\text{D}_2\text{O}$ ) in  $\beta$ -CD part of 1.0 mM F-azo-COOH in the presence of various concentrations of  $\beta$ -CD in 10 mM  $\text{Na}_2\text{CO}_3$  aqueous solution after irradiation with green light.

9.  $^1\text{H}$  NMR spectra (500 MHz,  $\text{D}_2\text{O}$ ) of 1.0 mM F-azo-COOH in the presence of various concentrations of  $\alpha$ - and  $\beta$ -CD after irradiation with green light and Benesi-Hildebrand plot<sup>2</sup>

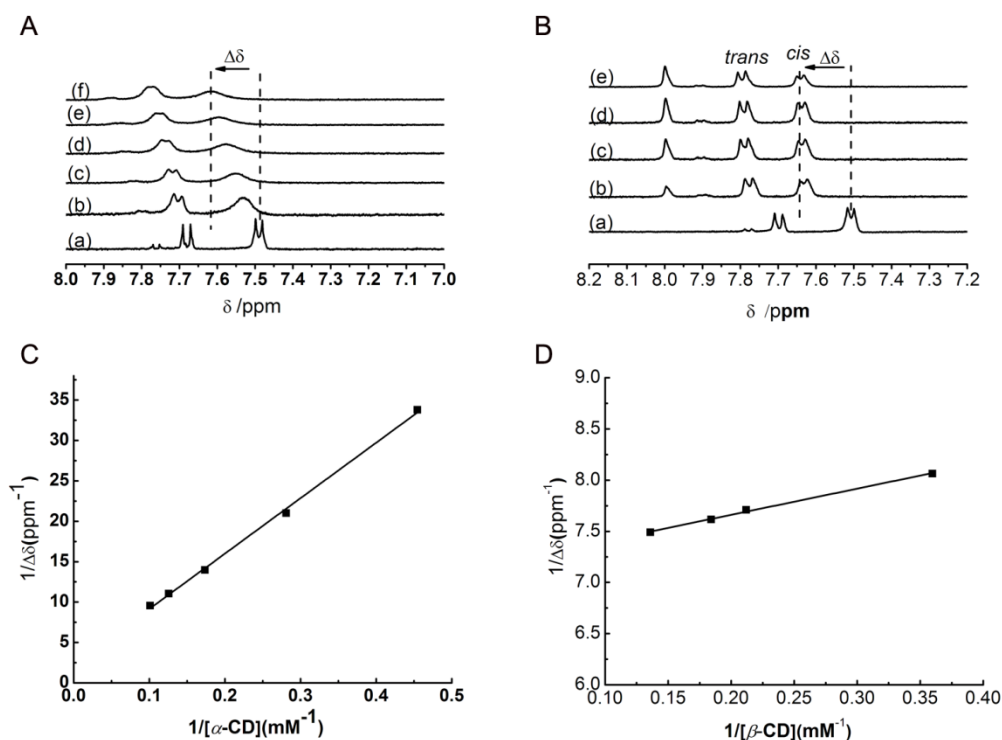

**Figure S11.**  $^1\text{H}$  NMR spectra (500 MHz, 298 K,  $\text{D}_2\text{O}$ ) of 1.0 mM F-azo-COOH in the presence of various concentrations of  $\alpha$ - and  $\beta$ -CD in 10 mM  $\text{Na}_2\text{CO}_3$  aqueous solution after irradiation with green light (A and B) and Benesi-Hildebrand plot of  $1/\Delta\delta_{\text{obs}}$  against  $1/[\alpha\text{-CD}]$  and  $1/[\beta\text{-CD}]$ , respectively (C and D).  $C_{\text{CD}}$ : (a) 0, (b) 2, (c) 4, (d) 6, (e) 8 and (f) 10 mM.

## 10. Benesi-Hildebrand plot<sup>2</sup> of all complexes

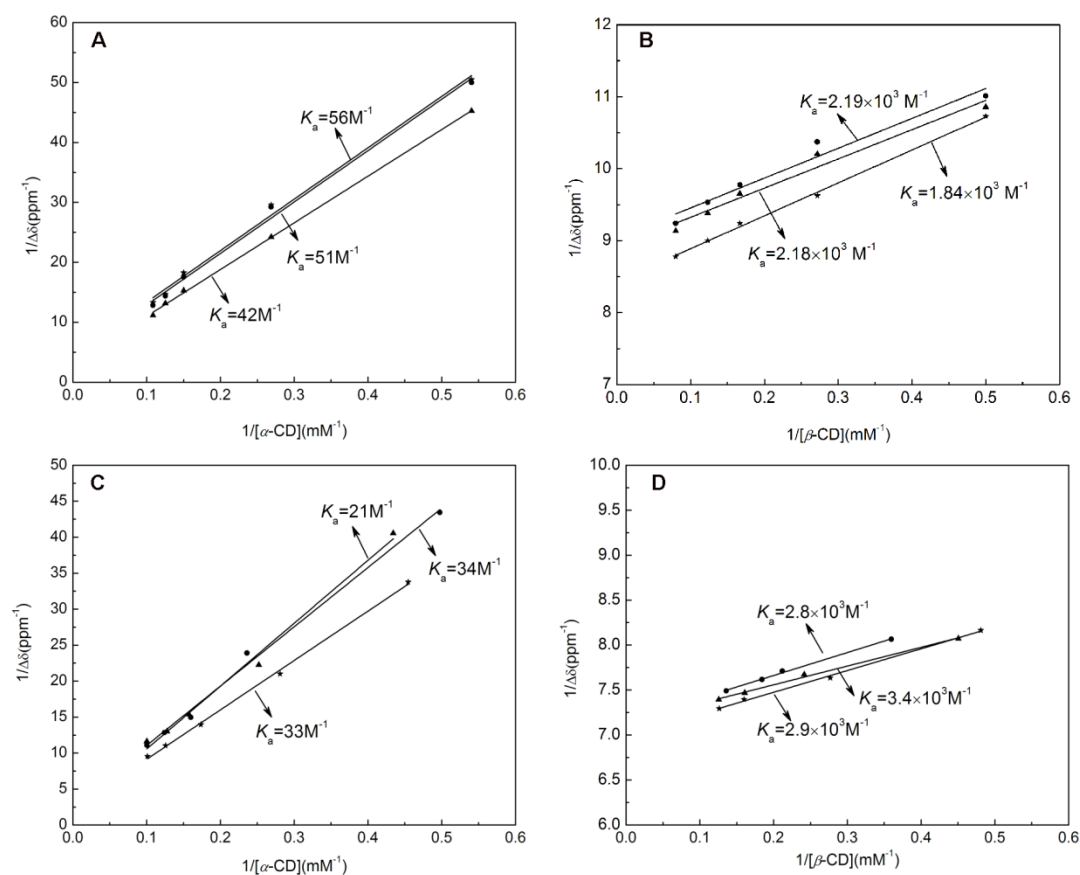

**Figure S12.** Benesi-Hildebrand plot (A) of  $1/\Delta\delta_{\text{obs}}$  (*trans*-F-azo-COOH) against  $1/[\alpha\text{-CD}]$ ; B) of  $1/\Delta\delta_{\text{obs}}$  (*trans*-F-azo-COOH) against  $1/[\beta\text{-CD}]$ ; C) of  $1/\Delta\delta_{\text{obs}}$  (*cis*-F-azo-COOH) against  $1/[\alpha\text{-CD}]$  and D) of  $1/\Delta\delta_{\text{obs}}$  (*cis*-F-azo-COOH) against  $1/[\beta\text{-CD}]$ .

**Table S1.** The data of detected association constant ( $K$ ) of *trans*-F-azo-COOH/ $\alpha$ -CD

|   | $K$ ( $\text{M}^{-1}$ ) | $K\text{-AVG}$ ( $\text{M}^{-1}$ ) |
|---|-------------------------|------------------------------------|
| 1 | 56                      | $50 \pm 7$                         |
| 2 | 51                      |                                    |
| 3 | 42                      |                                    |

**Table S2.** The data of detected association constant ( $K$ ) of *cis*-F-azo-COOH/ $\alpha$ -CD

|   | $K$ ( $\text{M}^{-1}$ ) | $K\text{-AVG}$ ( $\text{M}^{-1}$ ) |
|---|-------------------------|------------------------------------|
| 1 | 21                      | $29 \pm 7$                         |
| 2 | 34                      |                                    |
| 3 | 33                      |                                    |

**Table S3.** The data of detected association constant ( $K$ ) of *trans*-F-azo-COOH/ $\beta$ -CD

|   | $K$ (M <sup>-1</sup> ) | $K$ -AVG (M <sup>-1</sup> ) |
|---|------------------------|-----------------------------|
| 1 | $1.84 \times 10^3$     | $2.1 \pm 0.2 \times 10^3$   |
| 2 | $2.18 \times 10^3$     |                             |
| 3 | $2.19 \times 10^3$     |                             |

**Table S4.** The data of detected association constant ( $K$ ) of *cis*-F-azo-COOH/ $\beta$ -CD

|   | $K$ (M <sup>-1</sup> ) | $K$ -AVG (M <sup>-1</sup> ) |
|---|------------------------|-----------------------------|
| 1 | $2.8 \times 10^3$      | $3.0 \pm 0.3 \times 10^3$   |
| 2 | $2.9 \times 10^3$      |                             |
| 3 | $3.4 \times 10^3$      |                             |

# 11. ICD and UV-vis spectra of $5 \times 10^{-5}$ M F-azo-COOH in the presence of 10 mM

**$\alpha$ -CD before and after irradiation with green light**

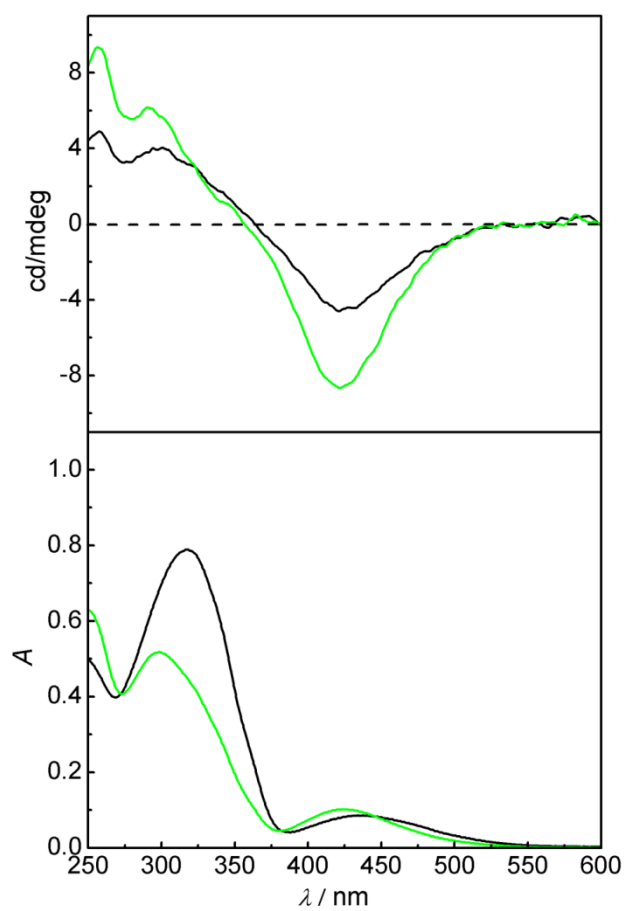

**Figure S13.** ICD and UV-vis spectra of  $5 \times 10^{-5}$  M F-azo-COOH in the presence of 10 mM  $\alpha$ -CD before (black line) and after irradiation with green light for 10 min (green line) measured in 10 mM  $\text{Na}_2\text{CO}_3$  aqueous solution at room temperature.

- (1) Bléger, D.; Schwarz, J.; Brouwer, A. M.; Hecht, S. *J. Am. Chem. Soc.* 2012, *134*, 20597-20600.
- (2) Fielding, L. *Tetrahedron* 2000, *56*, 6151-6170.
